# Supplementary material for: Enhancing Photoelectric Powder Deposition of Polymers by Charge Control Substances
Source: MDPI journal article supplement (doi:10.3390/polym14071332), 2022-03-25
Supplement: s1 [file s1]

**Table S1.** Measured averaged peak values of the degree of coverage on the transfer roll

| Formulation<br>(cf. Tab. 2) | Silica(-)<br>wt. % | Silica(+)<br>Wt. % | Electrostatic surface<br>potential / V |
|-----------------------------|--------------------|--------------------|----------------------------------------|
| 1.1                         | 0.05               | -                  | $-73.0 \pm 16.5$                       |
| 2                           | 0.1                | -                  | $-61.6 \pm 5.8$                        |
| 3                           | 0.25               | -                  | $-125.6 \pm 4.2$                       |
| 4                           | 0.5                | -                  | $-124.9 \pm 24.3$                      |
| 5.1                         | 1.0                | -                  | $-75.4 \pm 5.9$                        |
| 6.1                         | -                  | 0.05               | $39.1 \pm 10.9$                        |
| 7                           | -                  | 0.1                | $54.4 \pm 17.2$                        |
| 8                           | -                  | 0.25               | $86.5 \pm 37.5$                        |
| 9                           | -                  | 0.5                | $104.1 \pm 34.5$                       |
| 10.1                        | -                  | 1.0                | $85.0 \pm 27.6$                        |

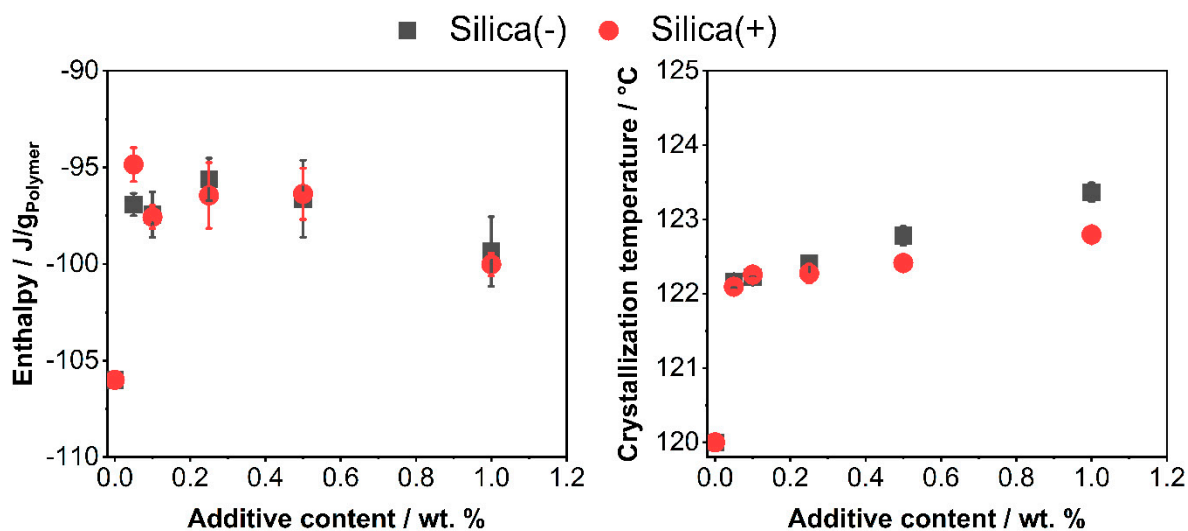

**Figure S1.** Crystallization behaviour of the functionalized powders; left: Crystallization enthalpy; right: Crystallization temperature; n = 3. The corresponding values are displayed in Tab. 3.
